# Supplementary material
Source: Springer Nature journal article supplement (https://www.springermedizin.de/resource/supplementary/12958_2011_955_MOESM1_ESM.pdf/9566450)

A

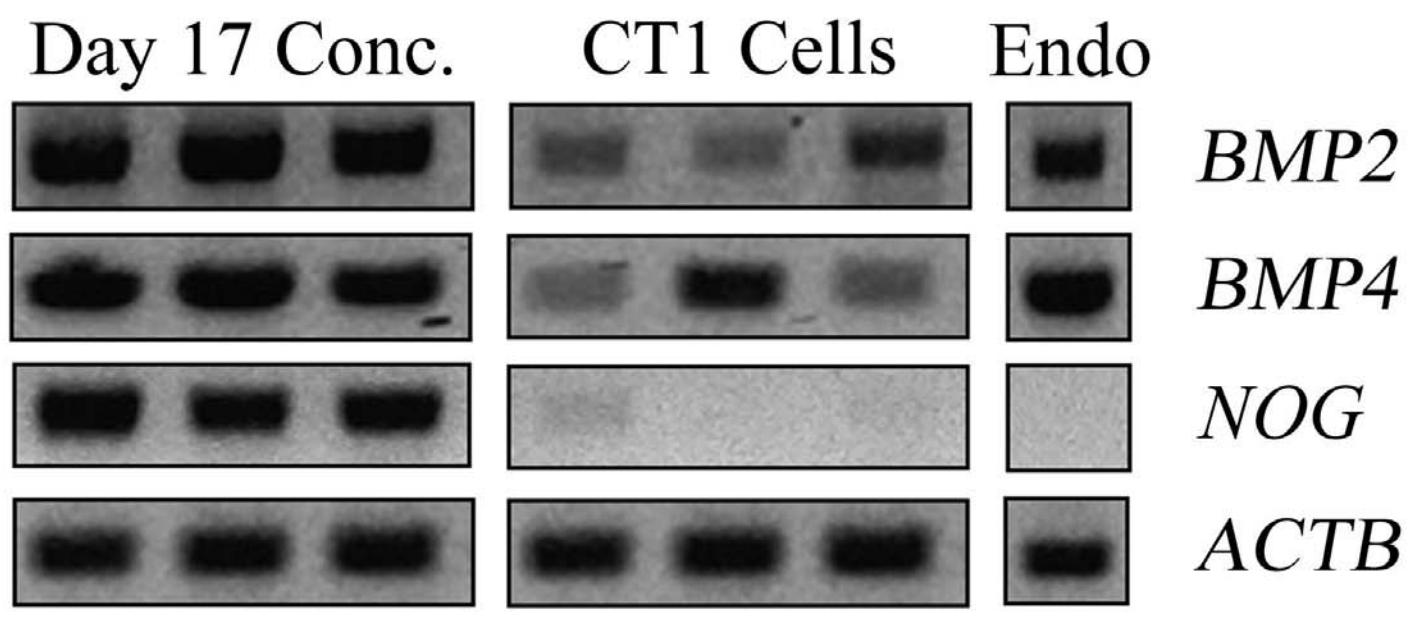

B

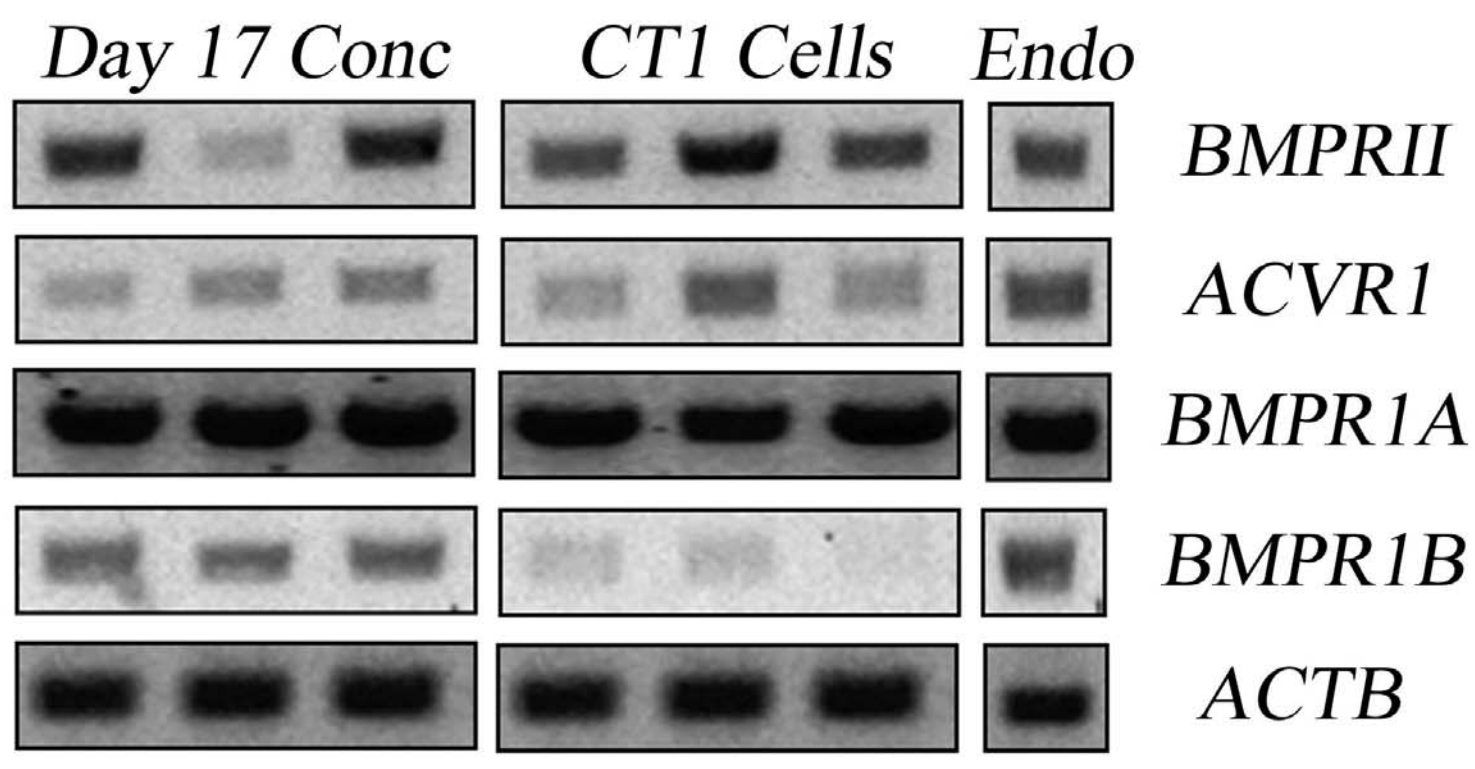

Supplement: MOESM1 [file 9566450]
